# Supplementary material
Source: PubMed Central journal article supplement (PMC7111339)
Supplement: mmc1.pdf [file mmc1.pdf]

## ***Supporting Information***

### ***Structure-Based Design and Synthesis of Macrocyclic Inhibitors of Norovirus Protease: Structural, Biochemical, Spectroscopic, and Antiviral Studies.***

Pathum M. Weerawarna,<sup>†</sup> Yunjeong Kim,<sup>‡</sup> Anushka C. Galasiti Kankanamalage,<sup>†</sup> Vishnu C. Damalanka,<sup>†</sup> Gerald H. Lushington,<sup>§</sup> Kevin R. Alliston,<sup>†</sup> Nurjahan Mehzabeen,<sup>||</sup> Kevin P. Battaile,<sup>⊥</sup> Scott Lovell,<sup>||</sup> Kyeong-Ok Chang,<sup>\*,‡</sup> William C. Groutas.<sup>\*,†</sup>

<sup>†</sup>Department of Chemistry, Wichita State University, Wichita, Kansas 67260, USA

<sup>‡</sup>Department of Diagnostic Medicine & Pathobiology, College of Veterinary Medicine, Kansas State University, Manhattan, Kansas 66506, USA

<sup>||</sup>Protein Structure Laboratory, The University of Kansas, Lawrence, Kansas 66047, USA

<sup>⊥</sup>IMCA-CAT, Hauptman-Woodward Medical Research Institute, APS Argonne National Laboratory, Argonne, IL 60439, USA

<sup>§</sup>LiS Consulting, Lawrence, KS 66046, USA

\*authors to whom correspondence should be addressed.

Department of Chemistry, Wichita State University, Wichita, KS 67260

Tel. (316) 978 7374; Fax: (316) 978 3431

e-mail: [bill.groutas@wichita.edu](mailto:bill.groutas@wichita.edu)

Department of Diagnostic Medicine & Pathobiology, Manhattan, KS 66506

Tel. (785) 532 3849; Fax: (785) 532 4039

e-mail: [kchang@vet.ksu.edu](mailto:kchang@vet.ksu.edu)

## Table of Contents

|                                                                                                |               |
|------------------------------------------------------------------------------------------------|---------------|
| 1. Representative assignment of 2D NMR resonances of macrocyclic precursor ester <b>28g</b> .. | <b>S2-6</b>   |
| 2. Variable temperature NMR studies of compounds <b>28a</b> , <b>28e</b> and <b>28g</b> .....  | <b>S7-8</b>   |
| 3. 1D $^3J_{\text{NH-CH}\alpha}$ coupling constants of precursor macrocyclic esters .....      | <b>S9-13</b>  |
| 4. Representative $^1\text{H-NMR}$ spectrum for synthesis of compound <b>10</b> .....          | <b>S14-17</b> |
| 5. X-ray crystallography derived information.....                                              | <b>S18-20</b> |

## Table of Figures

|                                                                                                                                                                                                           |            |
|-----------------------------------------------------------------------------------------------------------------------------------------------------------------------------------------------------------|------------|
| <b>FIGURE S1.</b> Selected HMBC, ROESY and COSY correlations of macrocyclic precursor ester...                                                                                                            | <b>S2</b>  |
| <b>FIGURE S2.</b> Selected COSY correlations of macrocyclic precursor ester <b>28g</b> .....                                                                                                              | <b>S3</b>  |
| <b>FIGURE S3.</b> Selected ROESY correlations of macrocyclic precursor ester <b>28g</b> .....                                                                                                             | <b>S4</b>  |
| <b>FIGURE S4.</b> Selected HMBC correlations of macrocyclic precursor ester <b>28g</b> .....                                                                                                              | <b>S5</b>  |
| <b>FIGURE S5.</b> Selected HMBC correlations of macrocyclic precursor ester <b>28g</b> .....                                                                                                              | <b>S6</b>  |
| <b>FIGURE S6.</b> Overlap of VT-NMR experiment spectra and line broadening.....                                                                                                                           | <b>S7</b>  |
| <b>FIGURE S7.</b> Temperature dependence of amide protons.....                                                                                                                                            | <b>S8</b>  |
| <b>FIGURE S8.</b> Coordinates of the Ramachandran plot of six $\phi$ and $\psi$ angle pairs of the corresponding $\text{P}_2$ and $\text{P}_3$ residues, extracted from the X-ray crystal structures..... | <b>S18</b> |
| <b>FIGURE S9.</b> LigPlot diagrams of the X-ray crystal structures.....                                                                                                                                   | <b>S19</b> |
| <b>FIGURE S10.</b> 2-Stranded antiparallel $\beta$ -sheet arrangement between NV 3CLpro and back bone of inhibitor <b>11</b> extracted from the X-ray crystal structure.....                              | <b>S20</b> |

## 1. Representative assignments of 2D NMR resonances of macrocyclic precursor ester **28g**

The spectral details, 2D and variable temperature (VT) NMR spectra were taken using a Varian XL-400 MHz NMR spectrometer. The sample was prepared by dissolving 30 mg of compound in one mL of DMSO- $d_6$ . Assignments of NH and CH $\alpha$  resonances were done using 1D  $^1H$  NMR, COSY, ROESY and HMBC spectral data recorded at 273 K. Temperature dependence of amide NH chemical shifts ( $\Delta\delta/T$ ) were examined within the temperature range of 298-343 K in 5 degree increments.

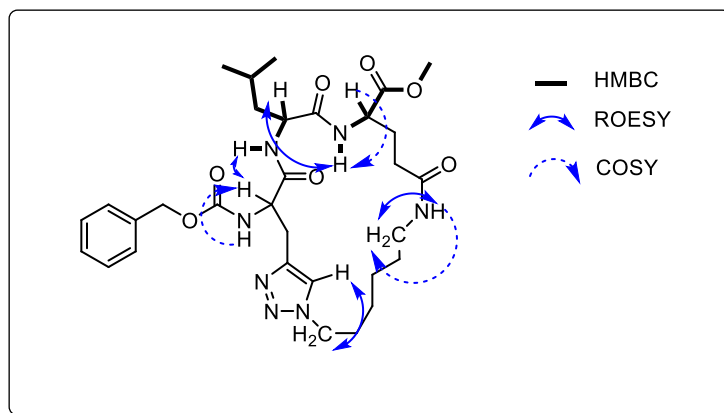

**FIGURE S1.** Selected HMBC, ROESY and COSY correlations of macrocyclic precursor ester **28g**

6C-COSY.fid.phasefile.esp

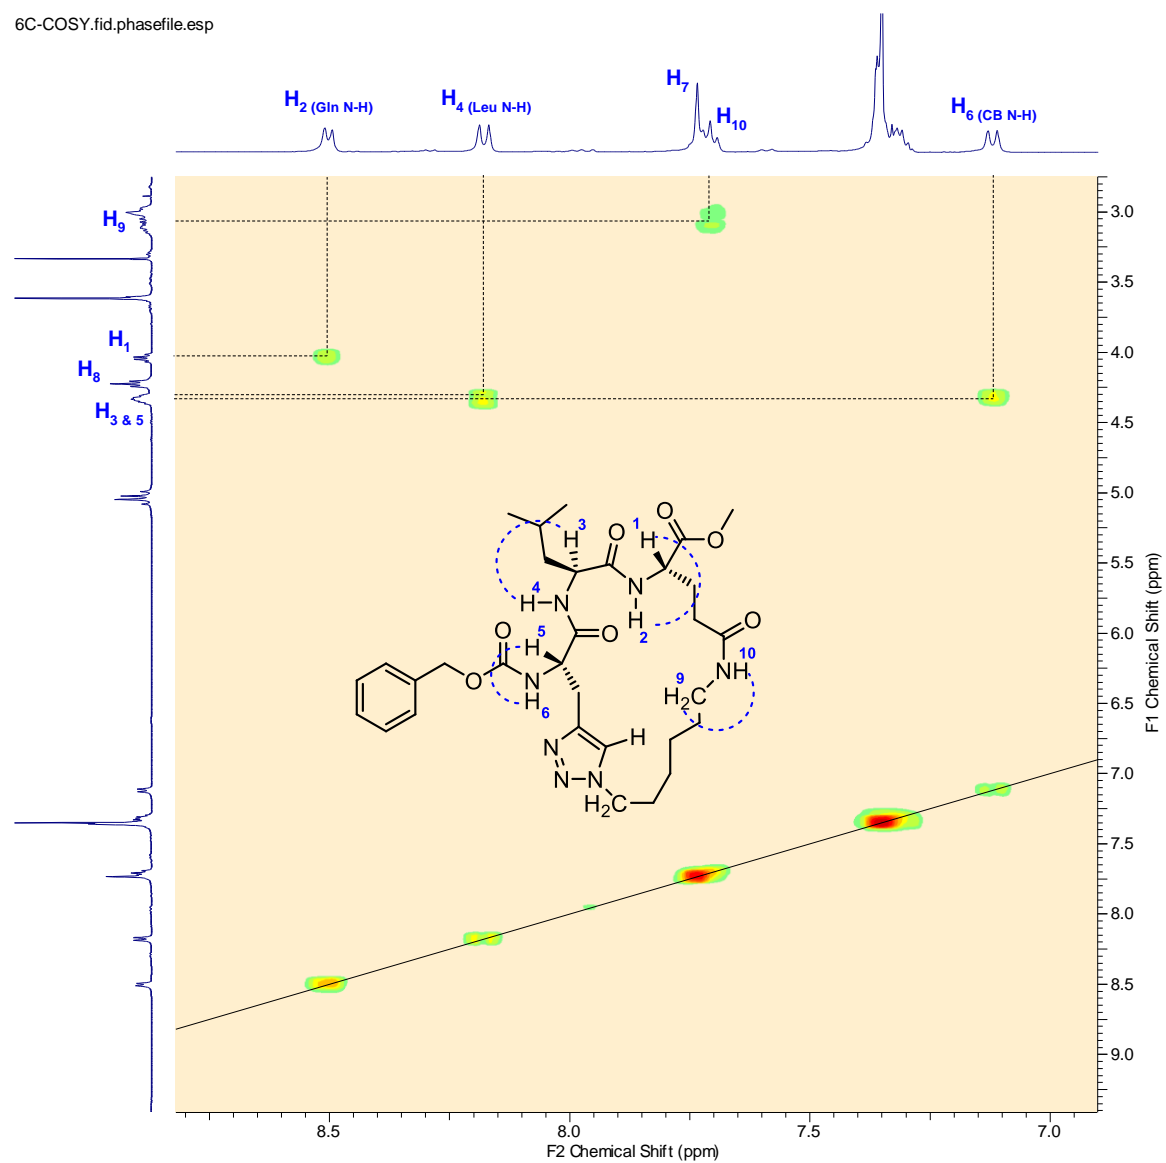

**FIGURE S2.** Selected COSY correlations of macrocyclic precursor ester **28g**

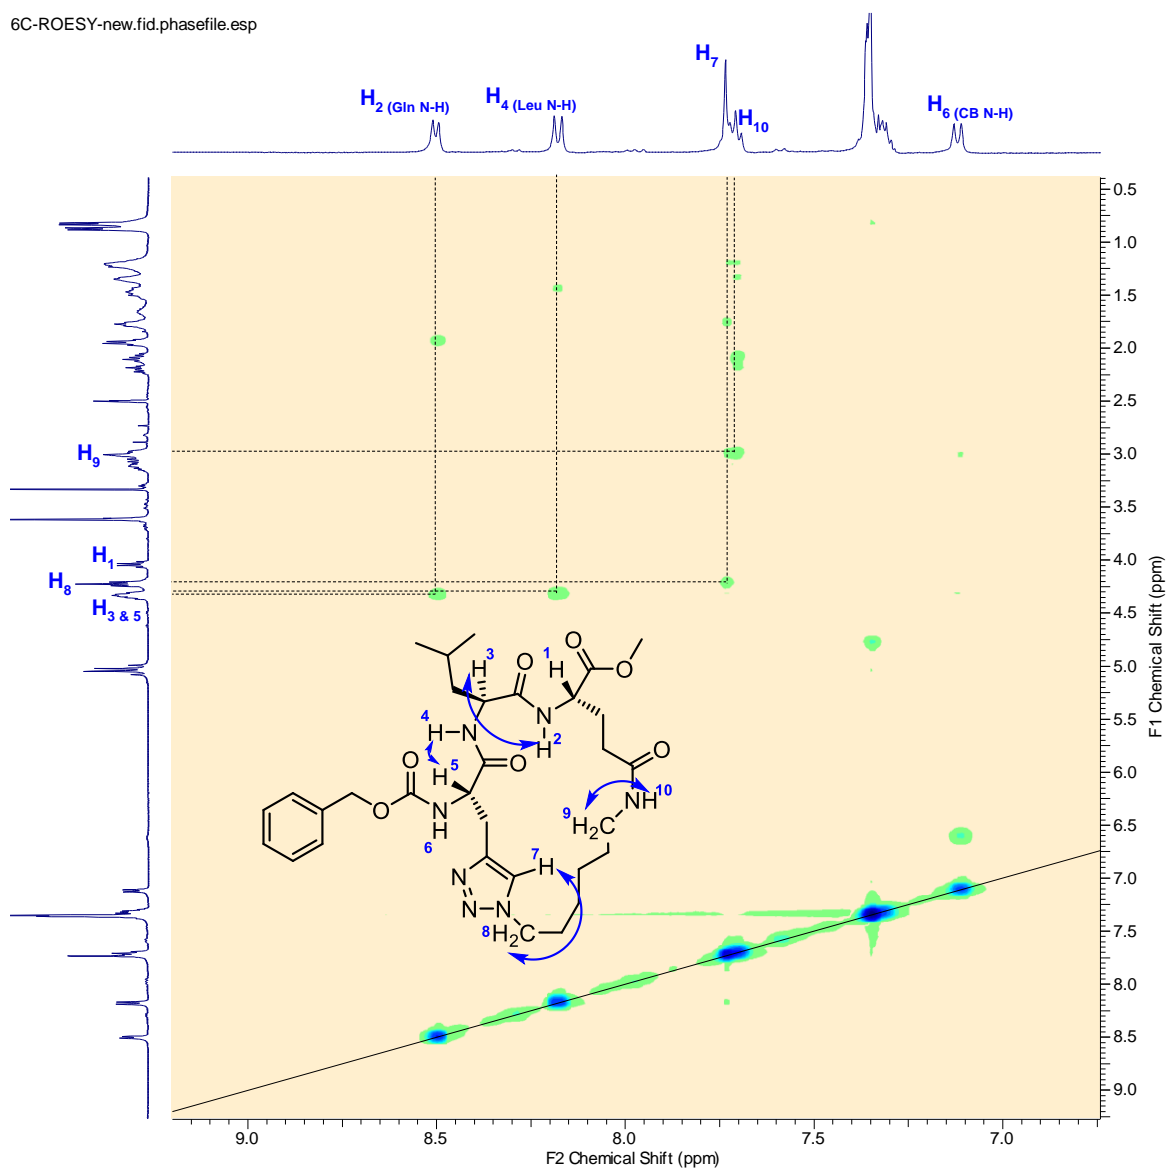

**FIGURE S3.** Selected ROESY correlations of macrocyclic precursor ester **28g**

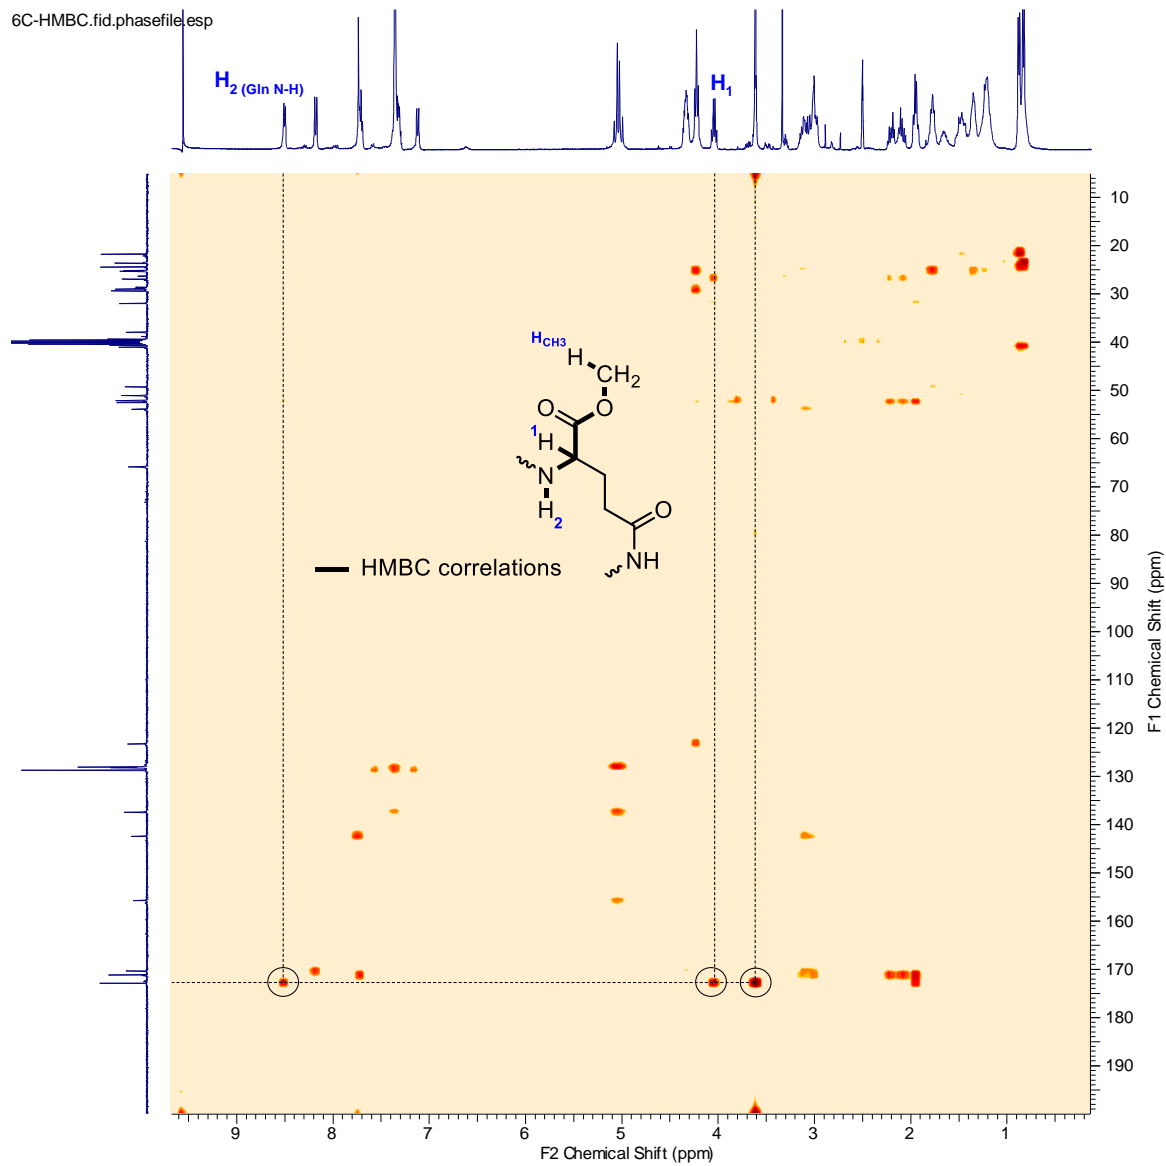

**FIGURE S4.** Selected HMBC correlations of macrocyclic precursor ester **28g**

6C-HMBC.fid.phasefile.esp

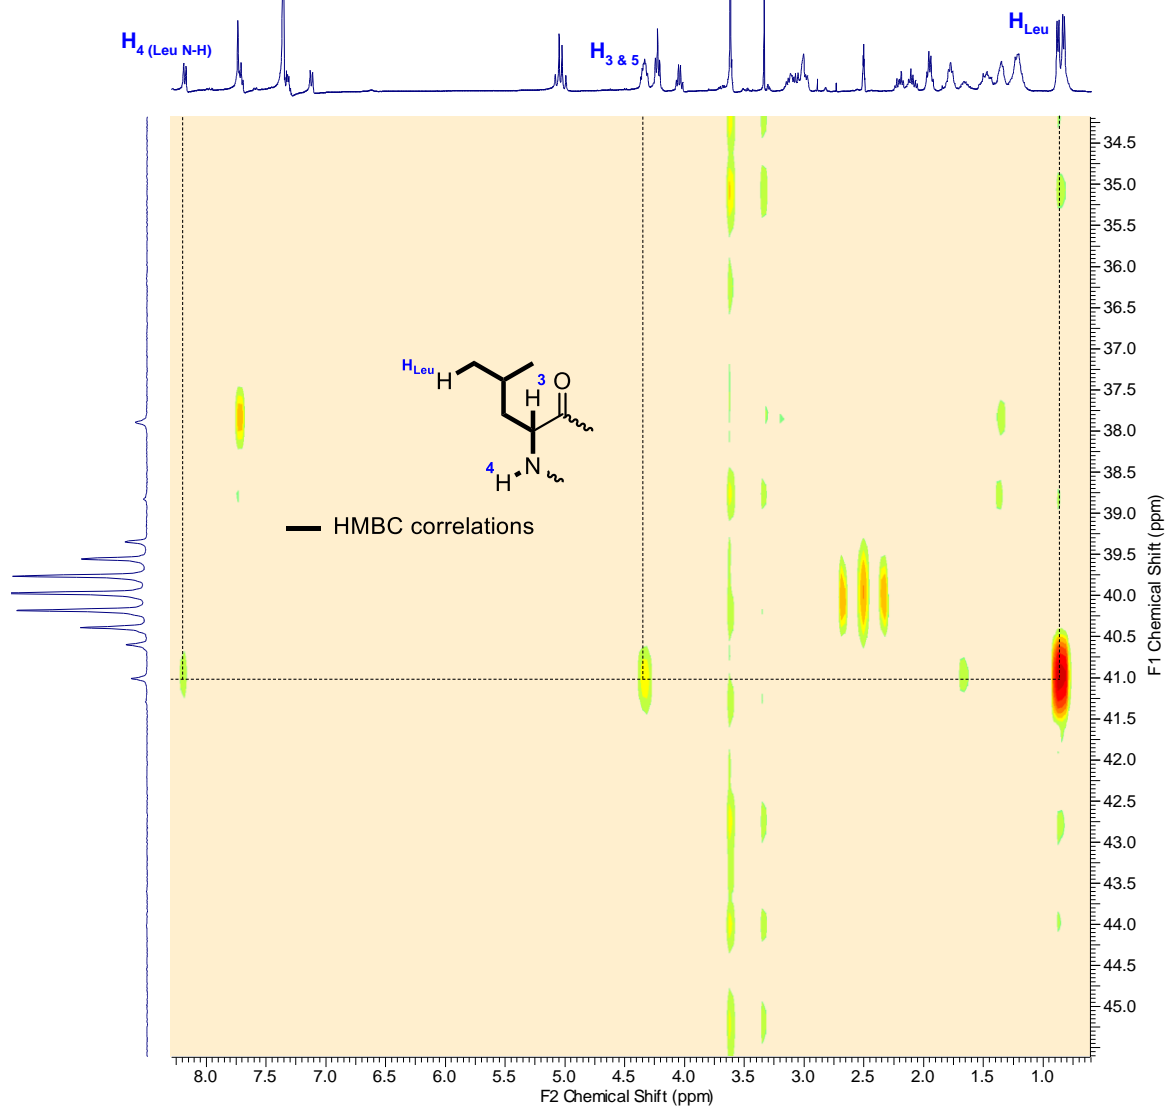

**FIGURE S5.** Selected HMBC correlations of macrocyclic precursor ester **28g**

## 2. Variable temperature NMR studies of compound **28a**, **28e** & **28g**

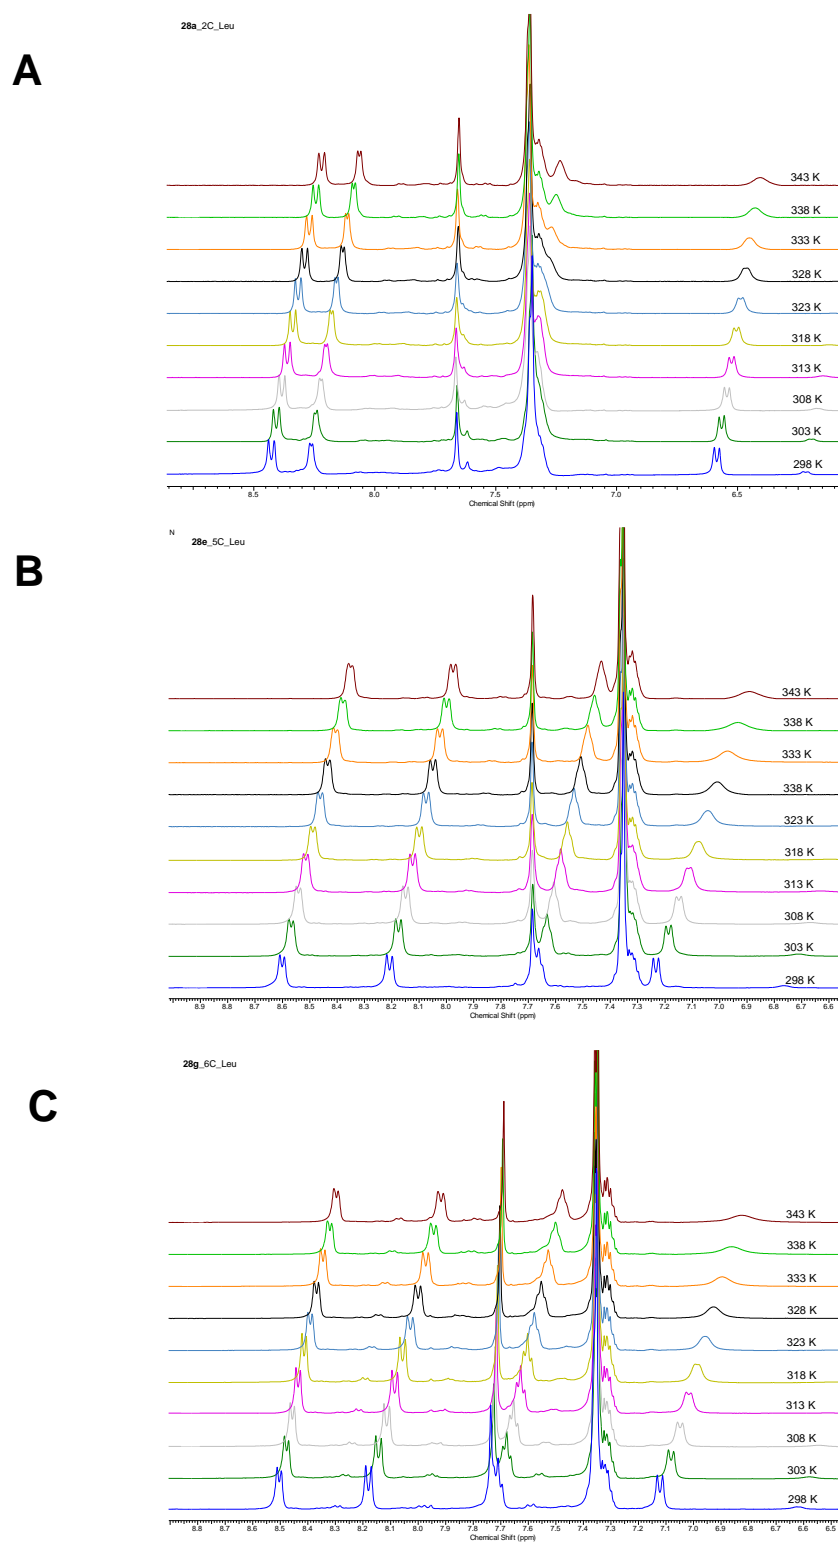

**FIGURE S6.** Overlap of VT-NMR experiment spectra and line broadening A) **28a** B) **28e** and C) **28g**



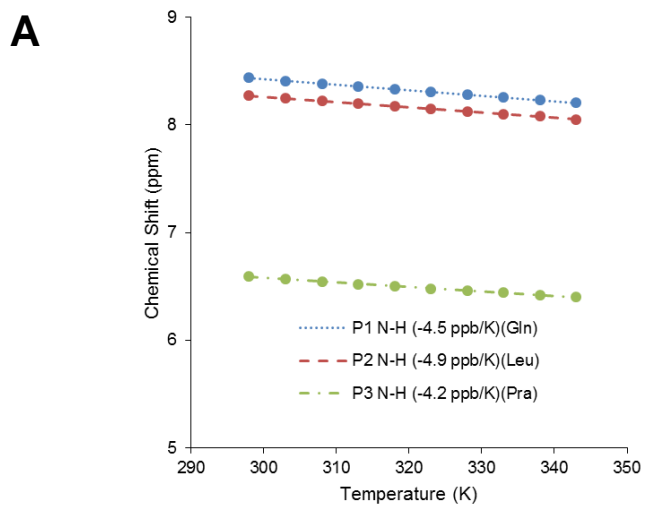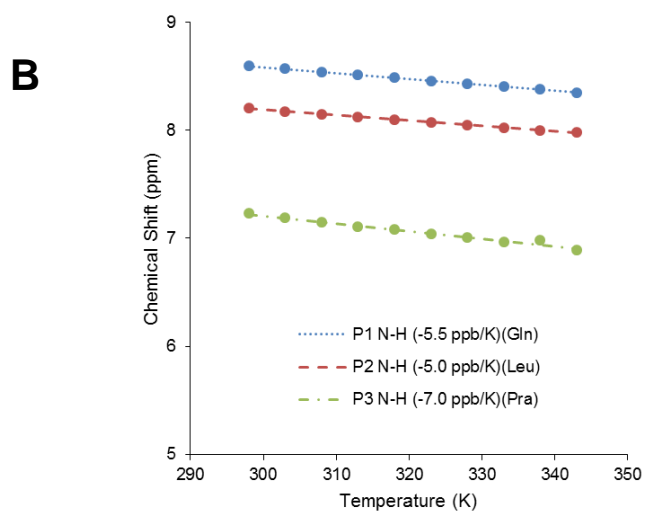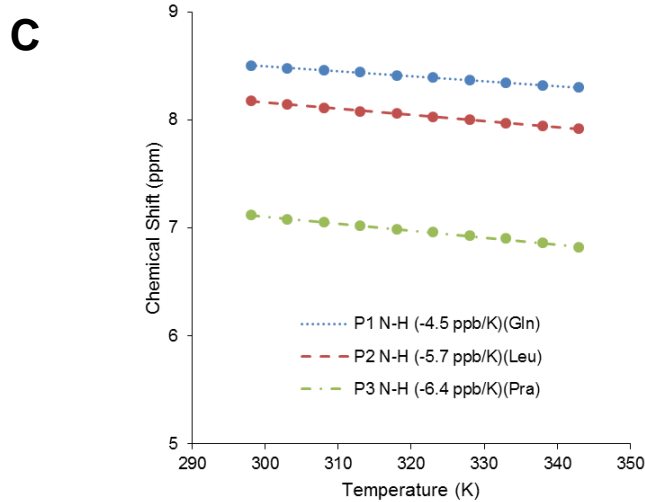

**FIGURE S7.** Temperature dependence of amide protons A) **28a** B) **28e** and C) **28g**

### 3. $1D^3 J_{NH-CH\alpha}$ coupling constants of precursor macrocyclic esters

$^1H$  NMR (400 MHz, DMSO- $d_6$ )  $\delta$  ppm 0.77 - 1.01 (m, 6 H) 1.34 - 1.59 (m, 3 H) 1.76 (dt,  $J=13.28, 6.64$  Hz, 1 H) 2.12 (d,  $J=16.80$  Hz, 1 H) 2.26 (t,  $J=12.89$  Hz, 1 H) 2.37 - 2.48 (m, 1 H) 2.75 - 2.91 (m, 1 H) 3.01 - 3.11 (m, 1 H) 3.24 (d,  $J=12.89$  Hz, 1 H) 3.59 - 3.69 (m, 3 H) 3.71 - 3.83 (m, 1 H) 4.01 - 4.20 (m, 2 H) 4.37 - 4.54 (m, 2 H) 4.61 - 4.74 (m, 1 H) 4.94 - 5.17 (m, 2 H) 6.60 (d,  $J=8.20$  Hz, 1 H) 7.22 - 7.43 (m, 6 H) 7.68 (s, 1 H) 8.28 (d,  $J=4.69$  Hz, 1 H) 8.45 (d,  $J=9.76$  Hz, 1 H)

28\_PW-III-2C-Leu-Cycl.esp

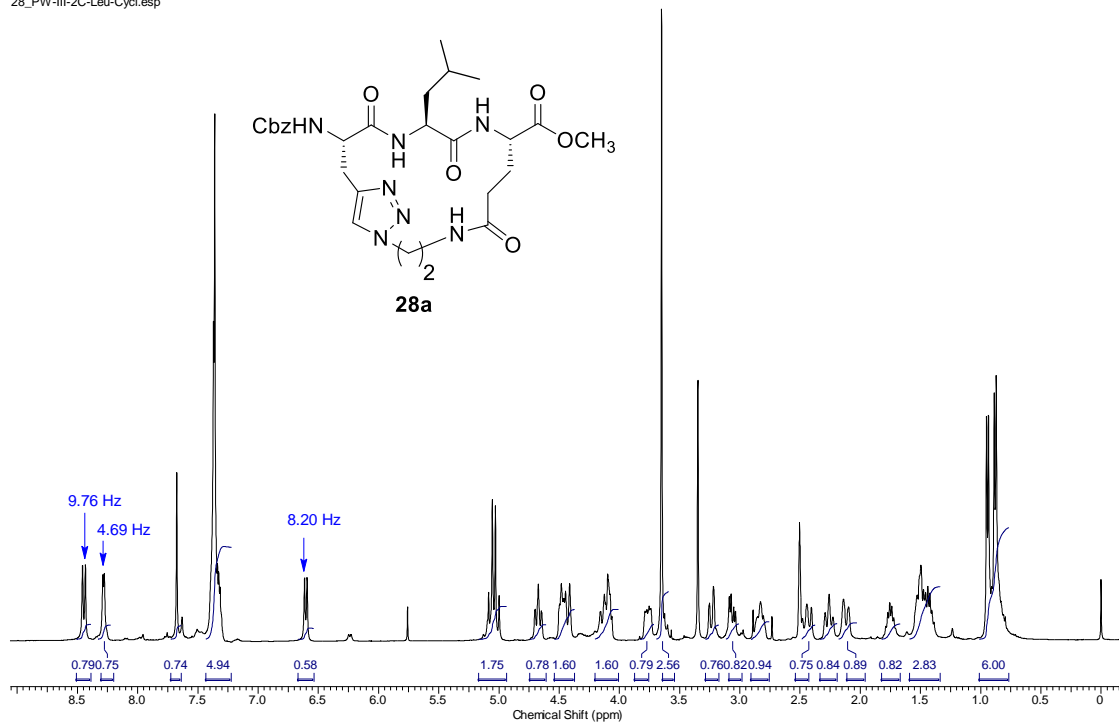

$^1H$  NMR (400 MHz, DMSO- $d_6$ )  $\delta$  ppm 0.79 - 0.96 (m, 2 H) 1.03 - 1.30 (m, 3 H) 1.46 (br. s., 4 H) 1.57 - 1.72 (m, 4 H) 1.75 - 1.89 (m, 1 H) 2.04 - 2.16 (m, 1 H) 2.18 - 2.33 (m, 1 H) 2.37 - 2.47 (m, 1 H) 2.74 - 2.91 (m, 1 H) 2.99 - 3.12 (m, 1 H) 3.15 - 3.26 (m, 1 H) 3.65 (s, 3 H) 3.71 - 3.82 (m, 1 H) 4.02 - 4.18 (m, 2 H) 4.37 - 4.52 (m, 2 H) 4.60 - 4.74 (m, 1 H) 5.04 (d,  $J=7.03$  Hz, 2 H) 6.53 - 6.69 (d,  $J=8.60$  Hz, 1 H) 7.22 - 7.44 (m, 6 H) 7.68 (s, 1 H) 8.18 - 8.30 (d,  $J=4.41$  Hz, 1 H) 8.36 - 8.47 (d,  $J=9.46$  Hz, 1 H)

28b\_PW-III-115.esp

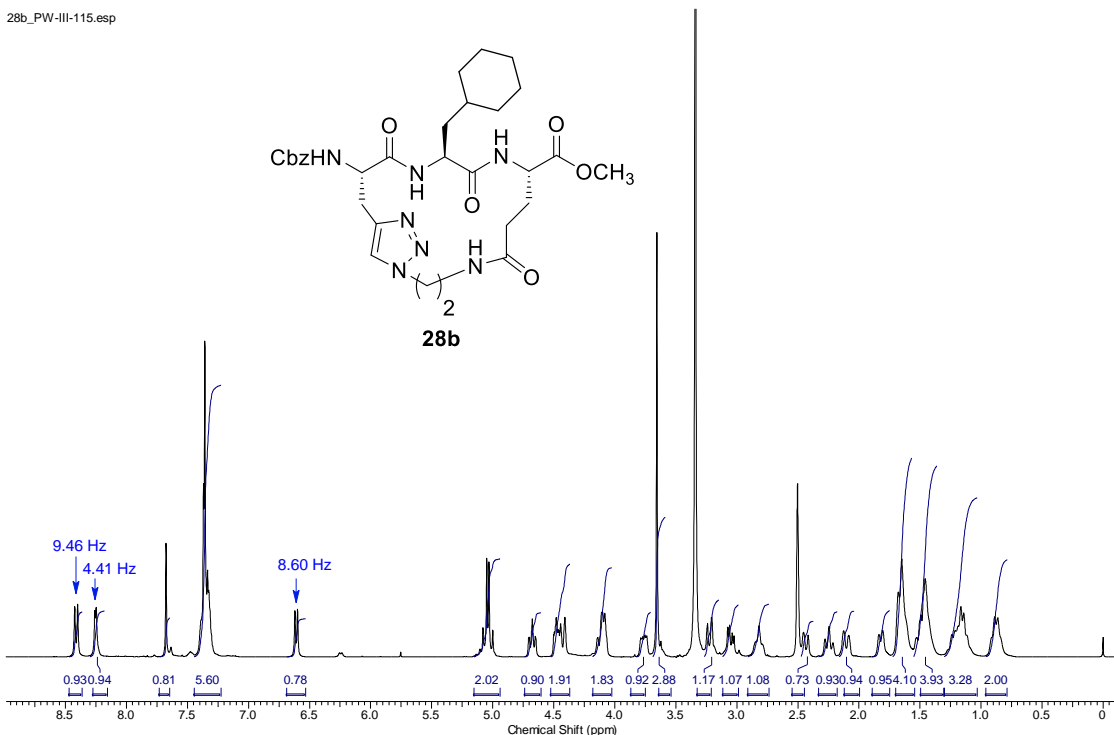

<sup>1</sup>H NMR (400 MHz, DMSO-*d*<sub>6</sub>) δ ppm 0.73 - 0.99 (m, 6 H) 1.45 (q, *J*=6.60 Hz, 3 H) 1.62 - 1.80 (m, 2 H) 1.83 - 1.94 (m, 1 H) 2.00 - 2.30 (m, 4 H) 2.60 - 2.76 (m, 1 H) 3.04 (d, *J*=4.30 Hz, 2 H) 3.57 - 3.68 (m, 3 H) 4.08 - 4.20 (m, 1 H) 4.26 - 4.45 (m, 4 H) 5.04 (d, *J*=9.76 Hz, 2 H) 7.03 (d, *J*=7.03 Hz, 1 H) 7.24 - 7.42 (m, 5 H) 7.53 (s, 2 H) 8.16 (d, *J*=7.42 Hz, 1 H) 8.53 (d, *J*=8.20 Hz, 1 H)

25a\_PW-III-104.esp

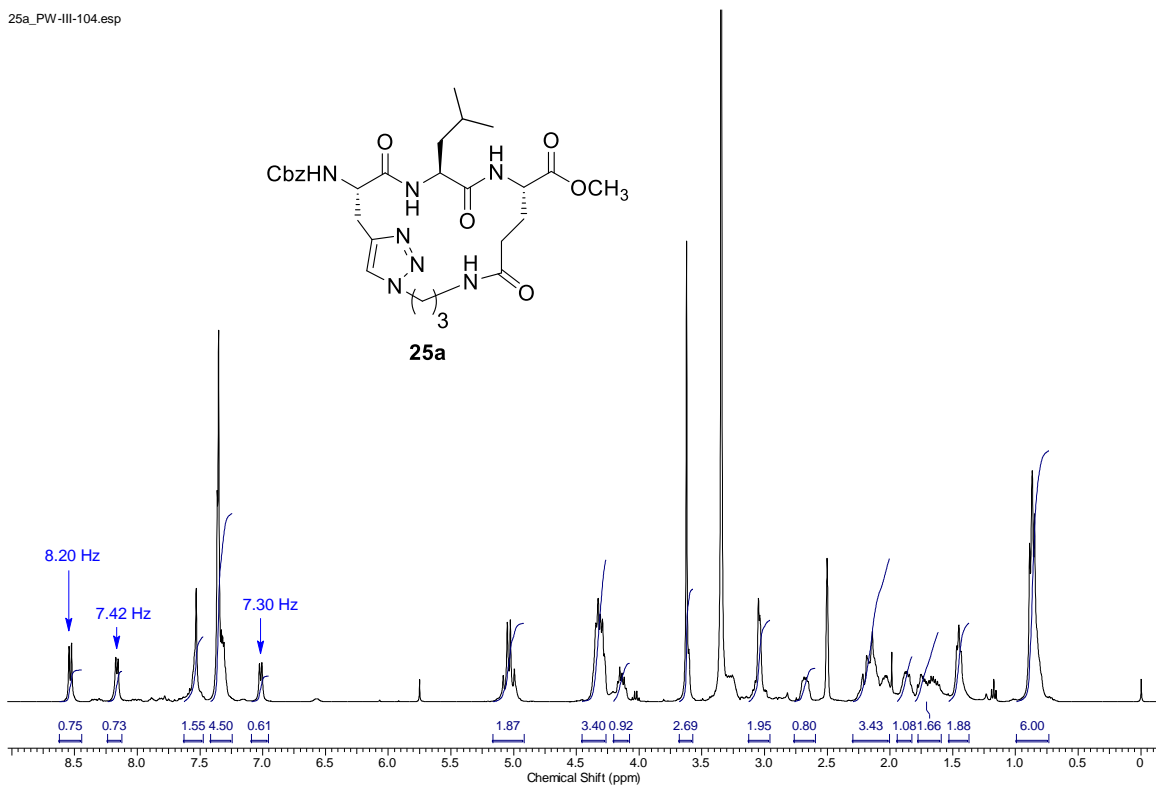

<sup>1</sup>H NMR (400 MHz, DMSO-*d*<sub>6</sub>) δ ppm 0.73 - 0.95 (m, 2 H) 1.02 - 1.26 (m, 3 H) 1.30 - 1.53 (m, 3 H) 1.54 - 1.79 (m, 6 H) 1.83 - 1.93 (m, 1 H) 1.98 - 2.29 (m, 4 H) 2.66 (dd, *J*=13.28, 6.25 Hz, 1 H) 3.03 (d, *J*=5.86 Hz, 2 H) 3.19 - 3.30 (m, 1 H) 3.63 (s, 3 H) 4.13 (dt, *J*=13.67, 6.44 Hz, 1 H) 4.22 - 4.43 (m, 4 H) 4.94 - 5.11 (m, 2 H) 7.06 (d, *J*=7.81 Hz, 1 H) 7.25 - 7.41 (m, 5 H) 7.46 - 7.58 (m, 2 H) 8.14 (d, *J*=7.42 Hz, 1 H) 8.52 (d, *J*=8.20 Hz, 1 H)

28c\_PW-III-116.esp

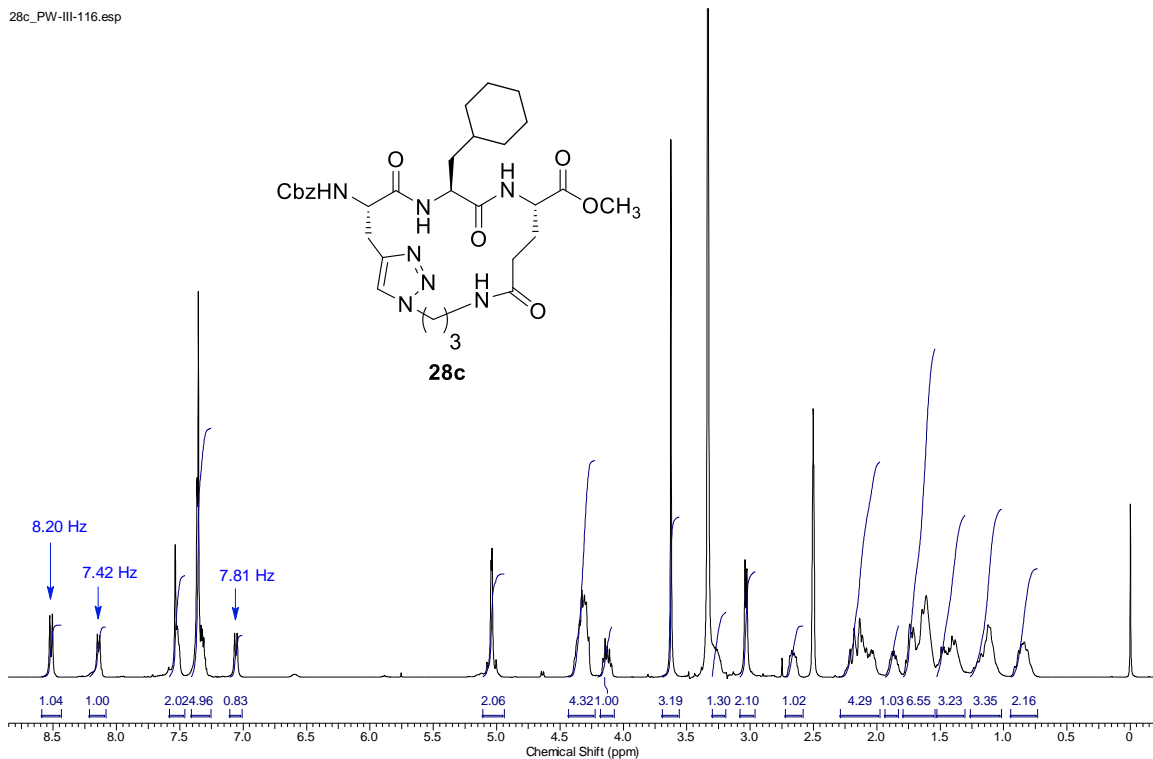

<sup>1</sup>H NMR (400 MHz, DMSO-*d*<sub>6</sub>) δ ppm 0.87 (dd, *J*=12.69, 6.44 Hz, 6 H) 1.14 - 1.32 (m, 2 H) 1.35 - 1.56 (m, 3 H) 1.57 - 1.83 (m, 4 H) 2.03 - 2.32 (m, 3 H) 2.73 (t, *J*=6.25 Hz, 1 H) 2.98 - 3.14 (m, 2 H) 3.54 - 3.70 (m, 3 H) 4.11 - 4.32 (m, 3 H) 4.32 - 4.44 (m, 2 H) 4.92 - 5.16 (m, 2 H) 6.91 (d, *J*=7.81 Hz, 1 H) 7.26 - 7.41 (m, 5 H) 7.67 - 7.83 (m, 2 H) 8.22 (d, *J*=7.42 Hz, 1 H) 8.36 (d, *J*=7.81 Hz, 1 H)

25b\_PW-III-86.esp

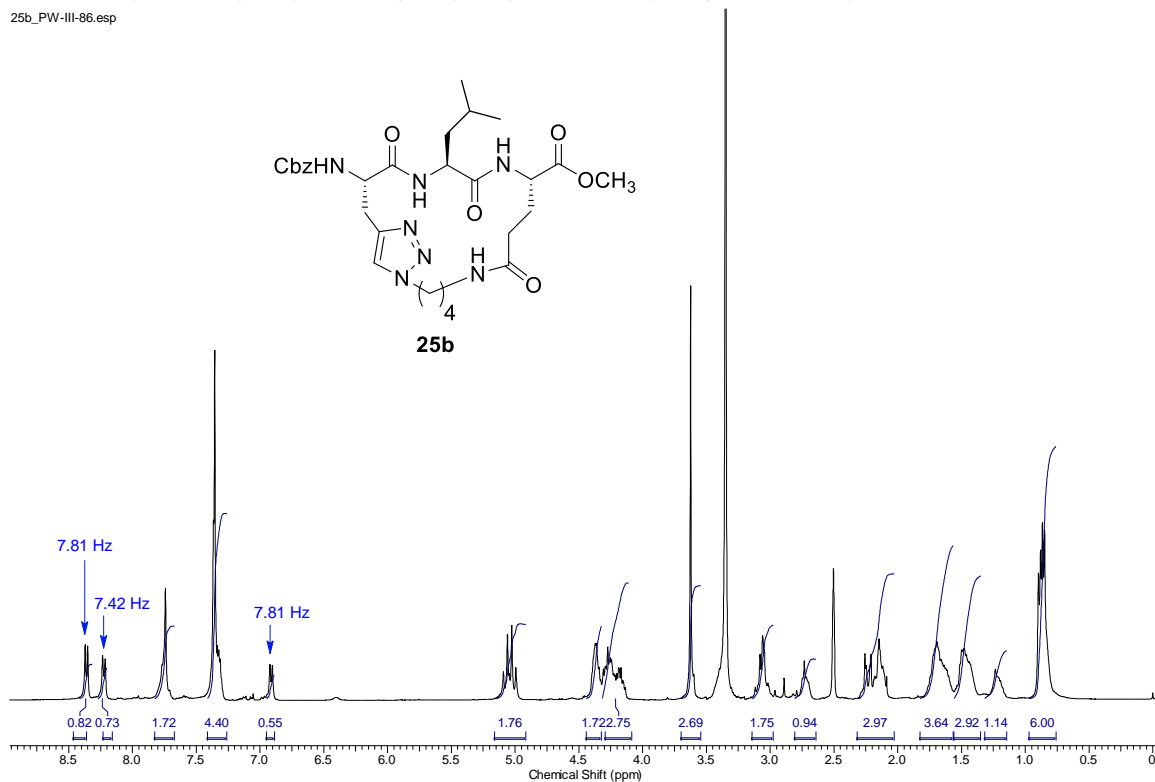

<sup>1</sup>H NMR (400 MHz, DMSO-*d*<sub>6</sub>) δ ppm 0.75 - 0.99 (m, 2 H) 1.03 - 1.29 (m, 4 H) 1.44 (d, *J*=9.76 Hz, 3 H) 1.50 - 1.81 (m, 10 H) 2.04 - 2.31 (m, 3 H) 2.65 - 2.79 (m, 1 H) 2.95 - 3.16 (m, 2 H) 3.62 (s, 3 H) 4.10 - 4.20 (m, 1 H) 4.22 - 4.31 (m, 2 H) 4.32 - 4.49 (m, 2 H) 4.93 - 5.14 (m, 2 H) 7.00 (d, *J*=7.42 Hz, 1 H) 7.25 - 7.47 (m, 5 H) 7.76 (s, 2 H) 8.22 (d, *J*=7.42 Hz, 1 H) 8.35 (d, *J*=7.81 Hz, 1 H)

28d\_PW-III-53-4c-cyclo.esp

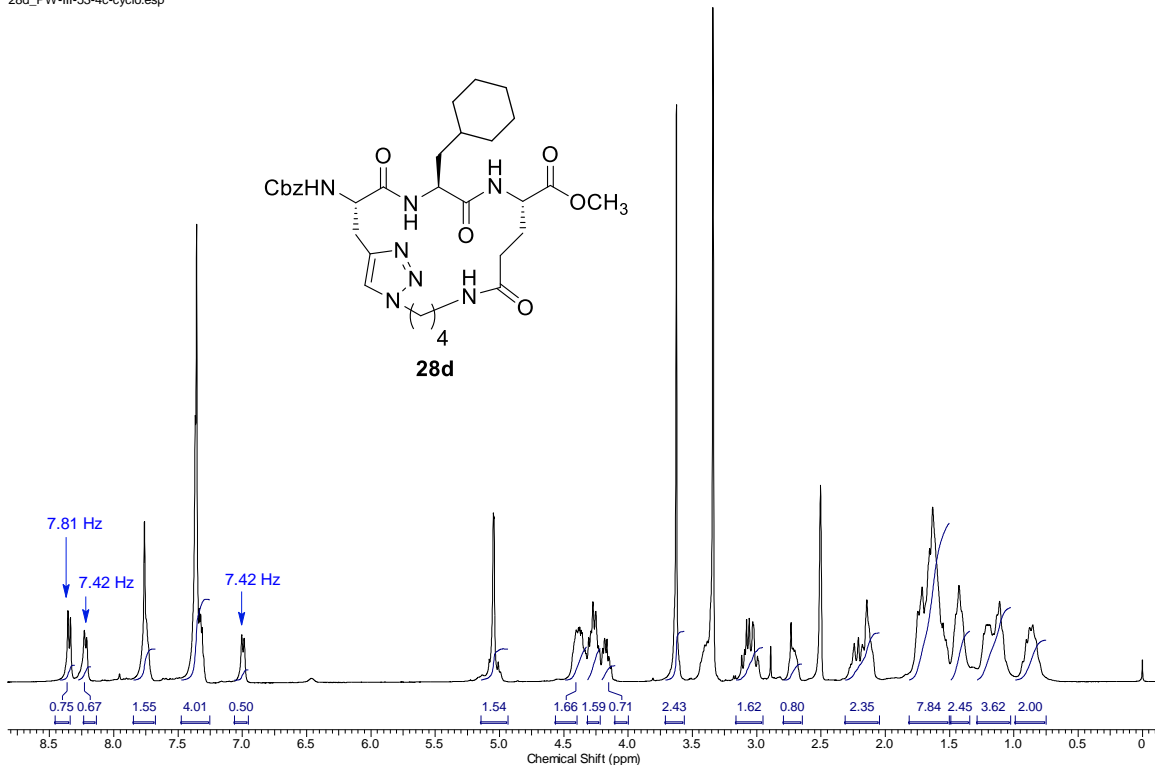

<sup>1</sup>H NMR (400 MHz, DMSO-*d*<sub>6</sub>) δ ppm 0.86 (dd, *J*=19.53, 6.25 Hz, 6 H) 1.06 - 1.24 (m, 2 H) 1.28 - 1.56 (m, 4 H) 1.58 - 1.82 (m, 3 H) 1.91 (dt, *J*=14.06, 7.03 Hz, 1 H) 1.98 - 2.06 (m, 1 H) 2.07 - 2.22 (m, 2 H) 2.88 - 3.16 (m, 4 H) 3.62 (s, 3 H) 4.11 (q, *J*=6.77 Hz, 1 H) 4.16 - 4.25 (m, 1 H) 4.26 - 4.41 (m, 3 H) 4.92 - 5.15 (m, 2 H) 7.23 (d, *J*=7.42 Hz, 1 H) 7.28 - 7.43 (m, 5 H) 7.55 - 7.74 (m, 2 H) 8.21 (d, *J*=7.81 Hz, 1 H) 8.60 (d, *J*=6.25 Hz, 1 H)

PW-III-32-H1

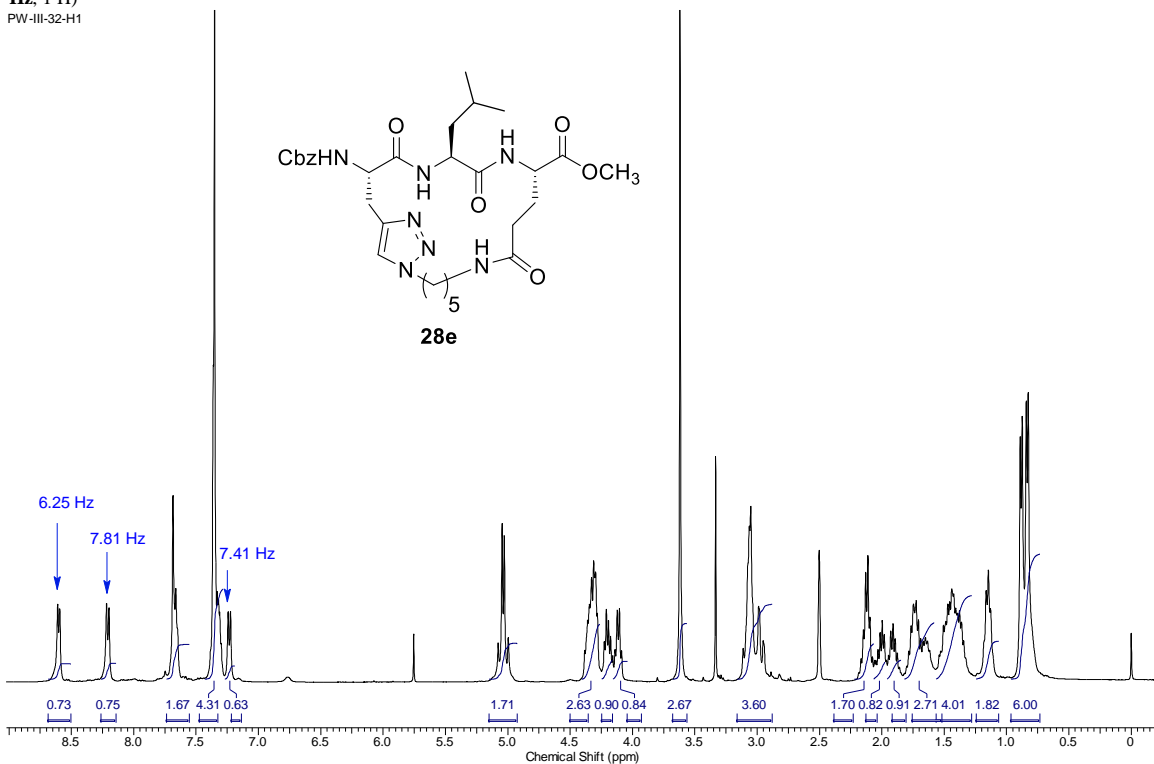

<sup>1</sup>H NMR (400 MHz, DMSO-*d*<sub>6</sub>) δ ppm 0.70 - 0.98 (m, 2 H) 1.03 - 1.27 (m, 5 H) 1.30 - 1.47 (m, 4 H) 1.49 - 1.85 (m, 8 H) 1.90 (dt, *J*=14.06, 7.03 Hz, 1 H) 1.96 - 2.06 (m, 1 H) 2.11 (dq, *J*=14.84, 7.42 Hz, 2 H) 2.91 - 3.18 (m, 4 H) 3.54 - 3.77 (m, 3 H) 4.07 - 4.16 (m, 1 H) 4.16 - 4.24 (m, 1 H) 4.25 - 4.48 (m, 3 H) 4.93 - 5.18 (m, 2 H) 7.24 - 7.47 (m, 5 H) 7.59 - 7.79 (m, 2 H) 8.19 (d, *J*=7.81 Hz, 1 H) 8.57 (d, *J*=6.64 Hz, 1 H)

28f\_PW-III-5c-cha-cycl.esp

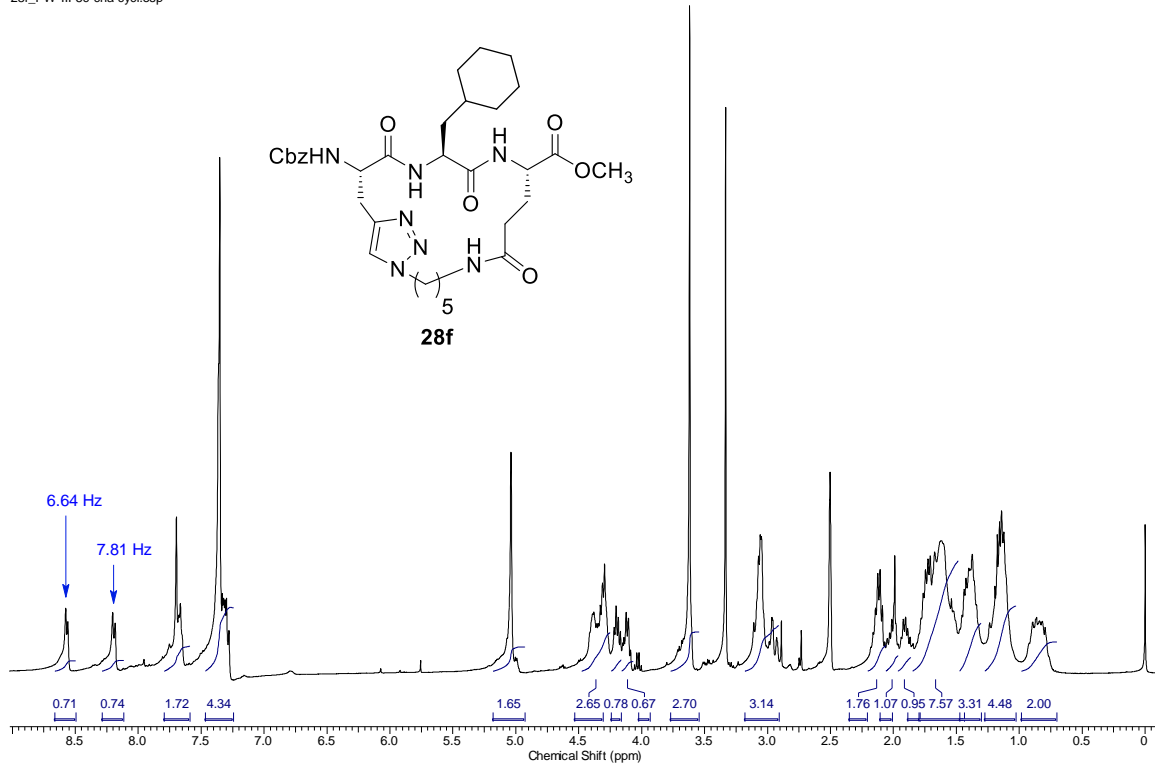

<sup>1</sup>H NMR (400 MHz, DMSO-*d*<sub>6</sub>) δ ppm 0.85 (dd, *J*=18.36, 6.25 Hz, 6 H) 1.22 (d, *J*=10.16 Hz, 4 H) 1.35 (br. s., 2 H) 1.42 - 1.55 (m, 2 H) 1.59 - 1.71 (m, 1 H) 1.72 - 1.86 (m, 2 H) 1.95 (q, *J*=6.51 Hz, 2 H) 2.04 - 2.15 (m, 1 H) 2.16 - 2.27 (m, 1 H) 2.91 - 3.21 (m, 4 H) 3.62 (s, 3 H) 4.04 (q, *J*=7.03 Hz, 1 H) 4.16 - 4.28 (m, 2 H) 4.29 - 4.41 (m, 2 H) 4.89 - 5.16 (m, 2 H) 7.12 (d, *J*=7.81 Hz, 1 H) 7.27 - 7.44 (m, 5 H) 7.65 - 7.78 (m, 2 H) 8.18 (d, *J*=8.20 Hz, 1 H) 8.50 (d, *J*=5.86 Hz, 1 H)

28g\_PW-III-28-H-25C.esp

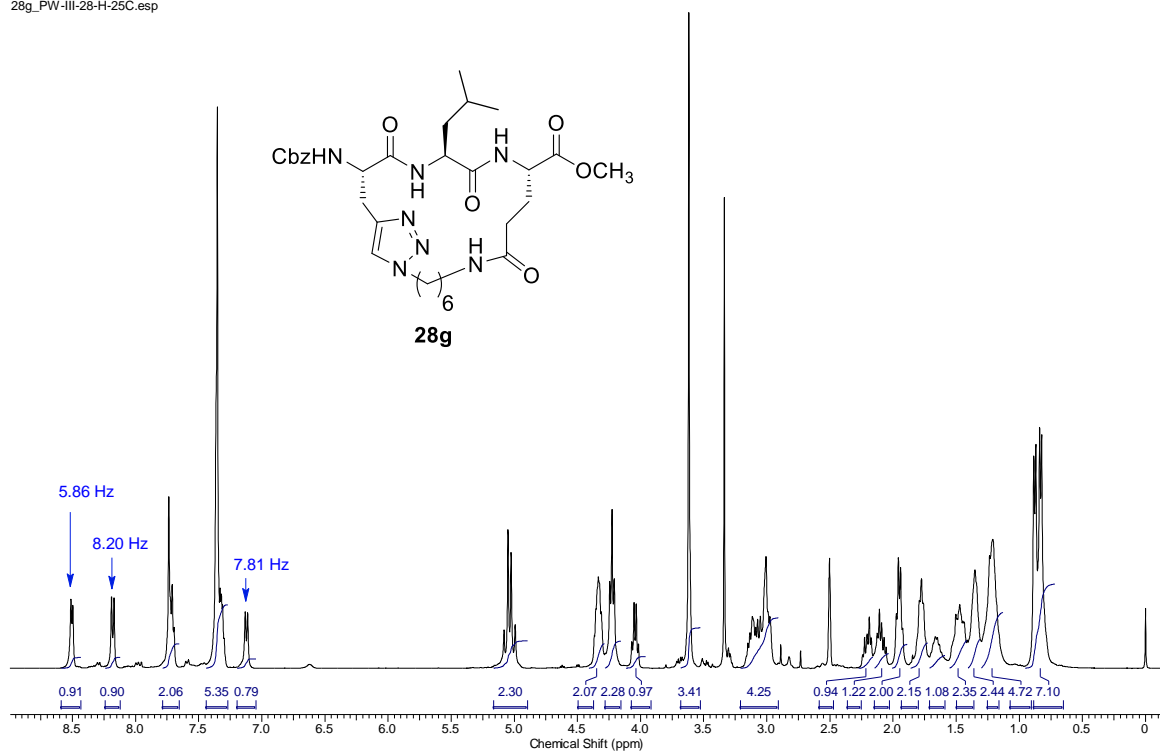

<sup>1</sup>H NMR (400 MHz, DMSO-*d*<sub>6</sub>) δ ppm 0.72 - 0.97 (m, 2 H) 1.04 - 1.29 (m, 7 H) 1.30 - 1.46 (m, 4 H) 1.48 - 1.73 (m, 6 H) 1.74 - 1.83 (m, 2 H) 1.94 (q, *J*=6.71 Hz, 2 H) 2.09 (d, *J*=7.02 Hz, 1 H) 2.14 - 2.27 (m, 1 H) 2.90 - 3.20 (m, 4 H) 3.61 (s, 3 H) 4.03 (d, *J*=6.71 Hz, 1 H) 4.22 (t, *J*=7.02 Hz, 2 H) 4.28 - 4.45 (m, 2 H) 5.04 (s, 2 H) 7.18 (d, *J*=7.63 Hz, 1 H) 7.26 - 7.44 (m, 5 H) 7.63 - 7.80 (m, 2 H) 8.16 (d, *J*=7.63 Hz, 1 H) 8.46 (d, *J*=6.10 Hz, 1 H)

28h\_PW-III-05-pure.esp

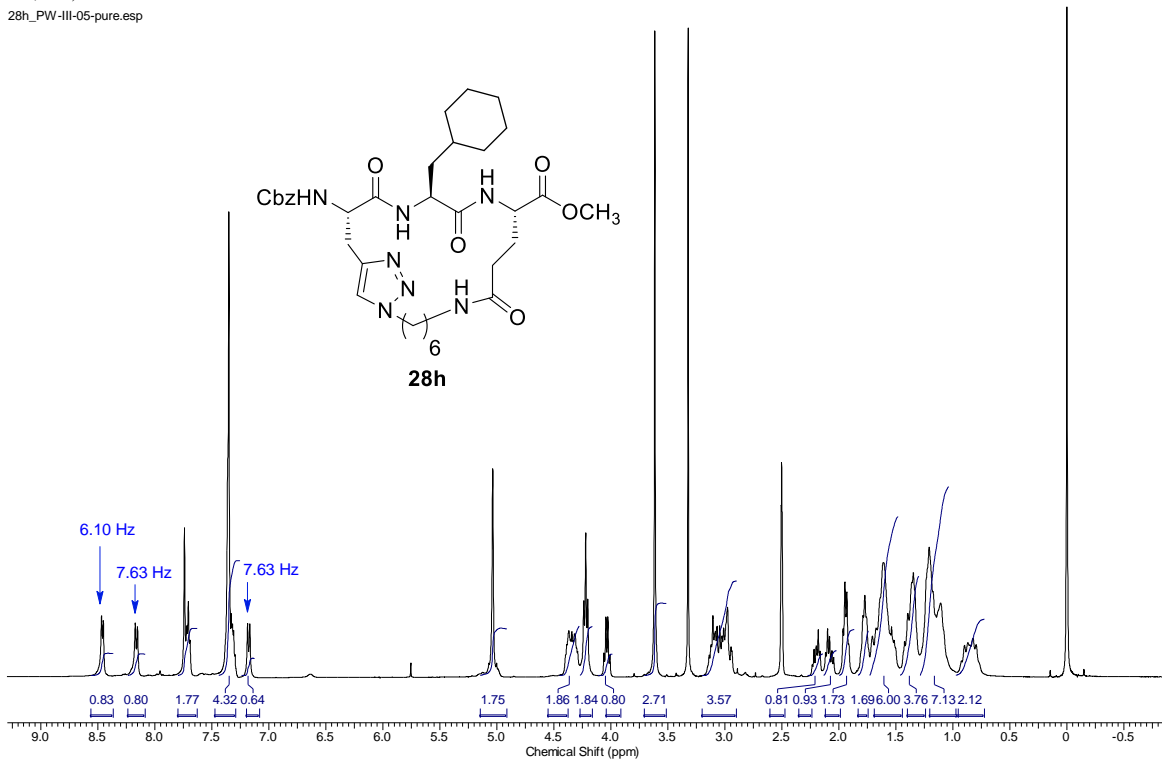

#### 4. Representative <sup>1</sup>H-NMR spectrum for synthesis of compound 10

PW-II-174.esp

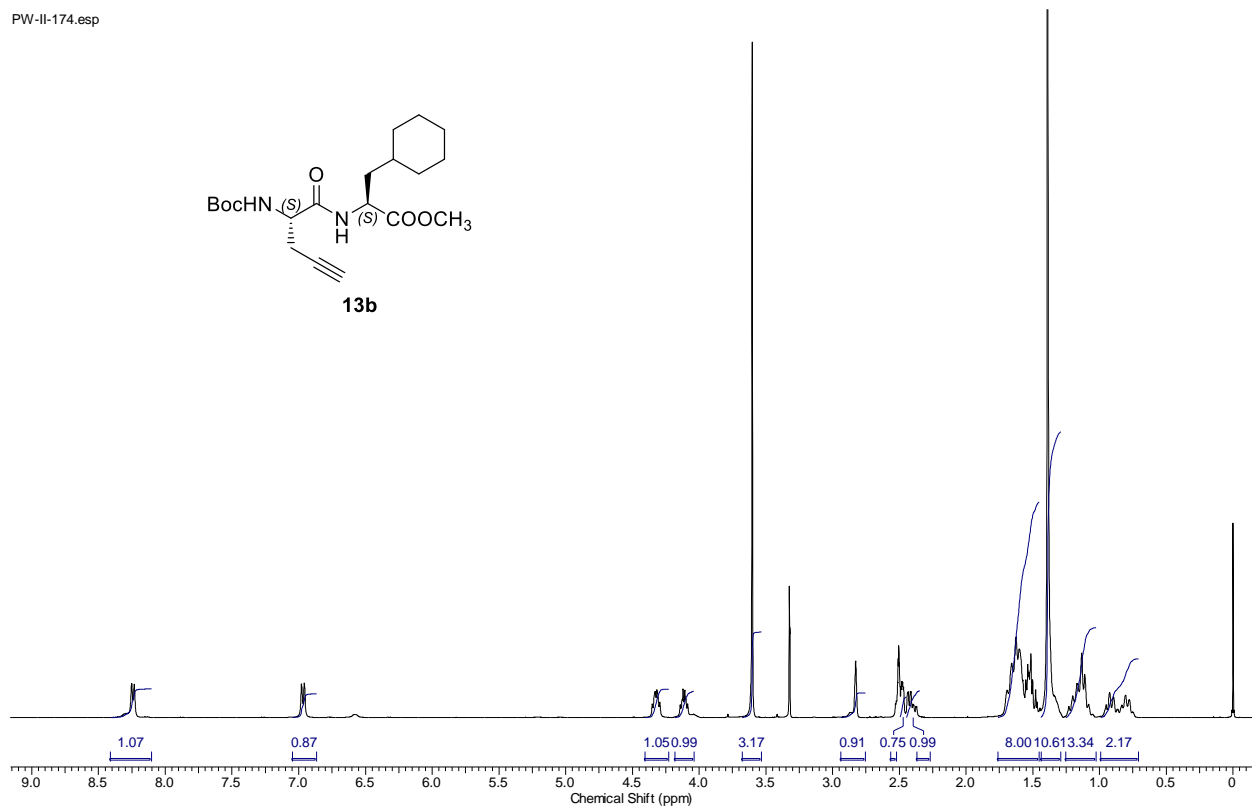

PW-II-177.esp

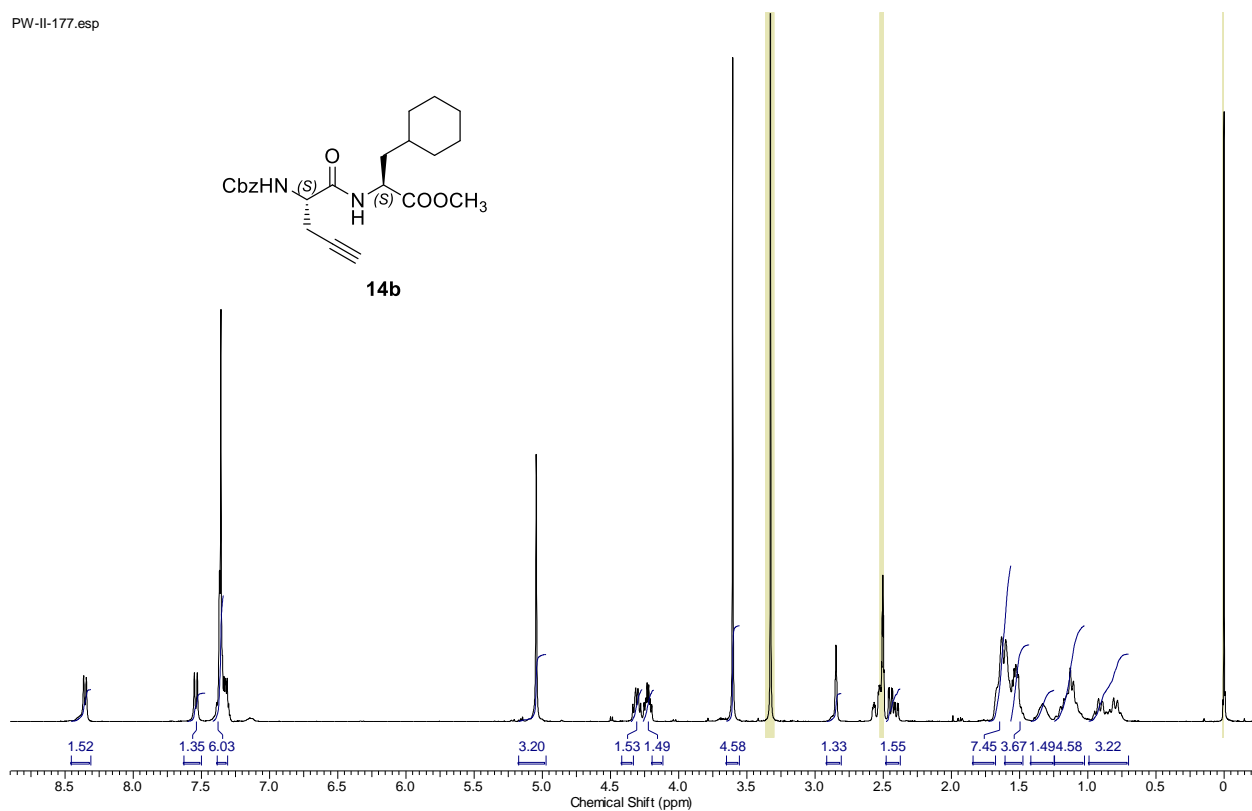

PW-II-187-2.esp

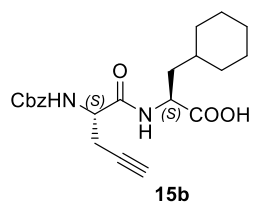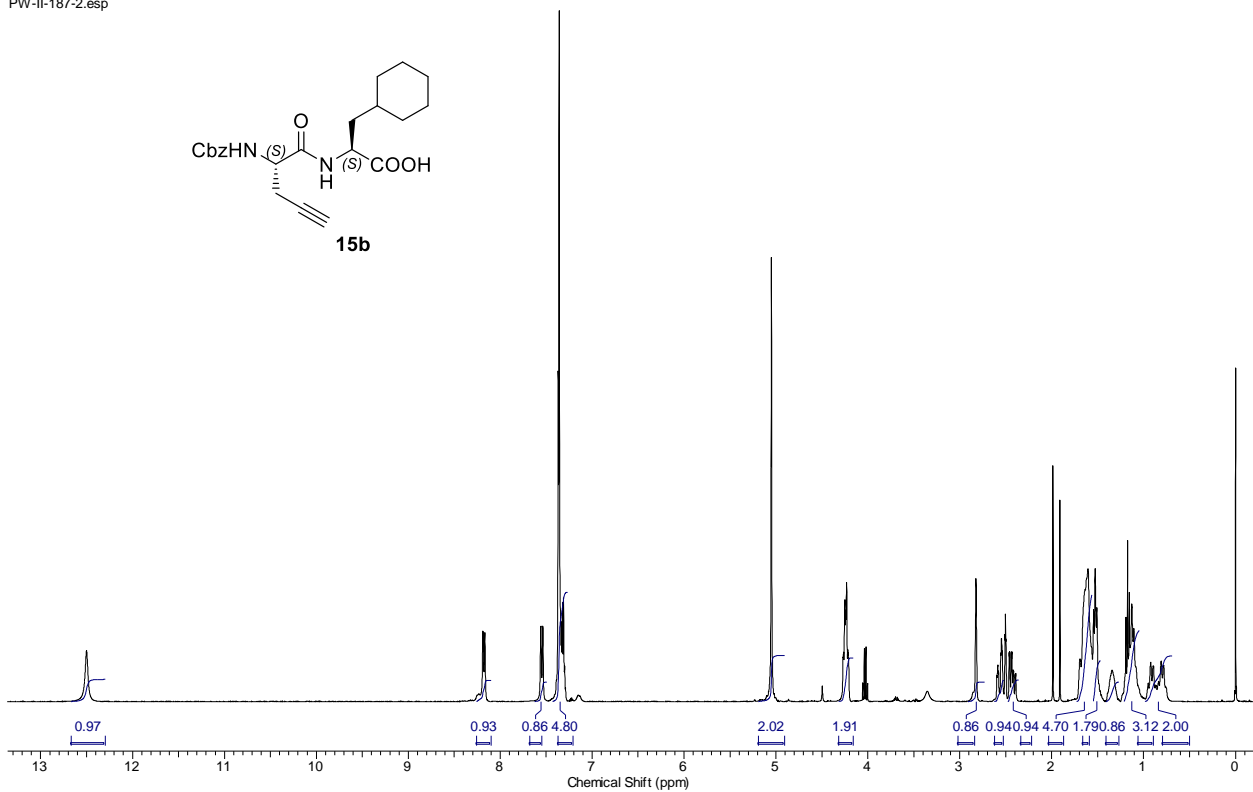

PW-II-191.esp

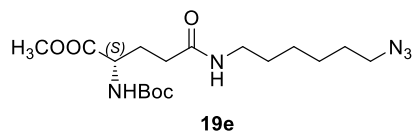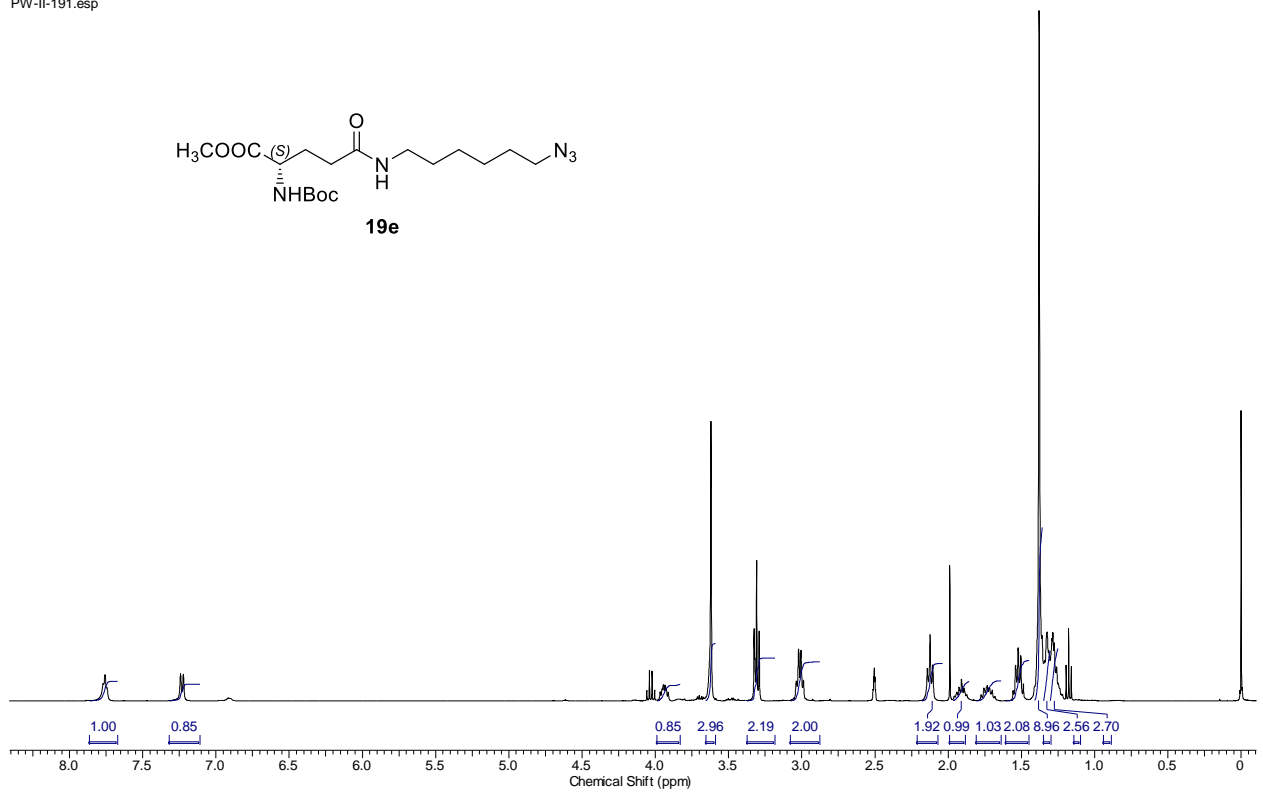



PW-III-01

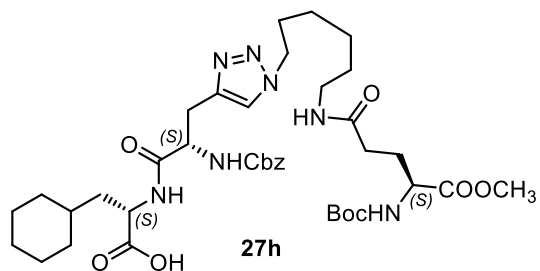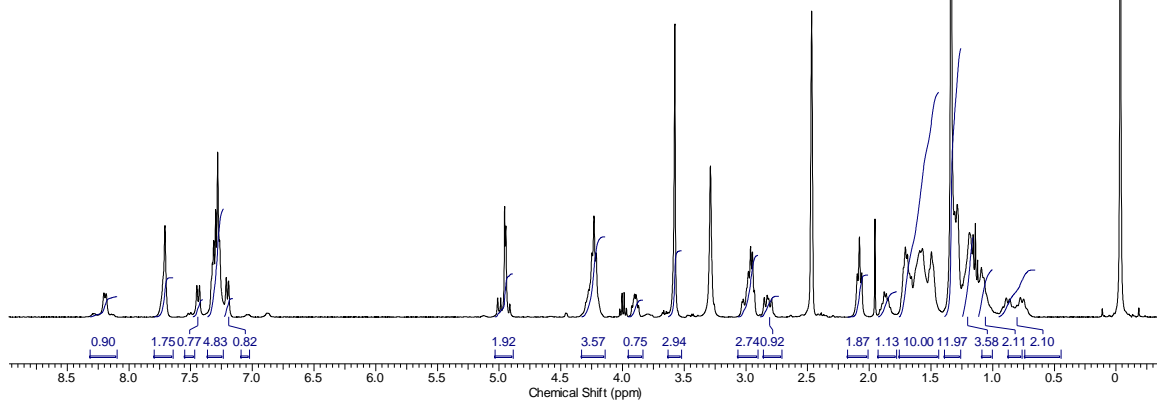

28h\_PW-III-05-pure.esp

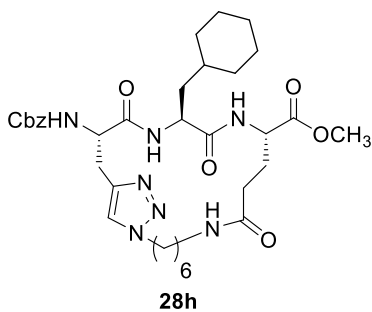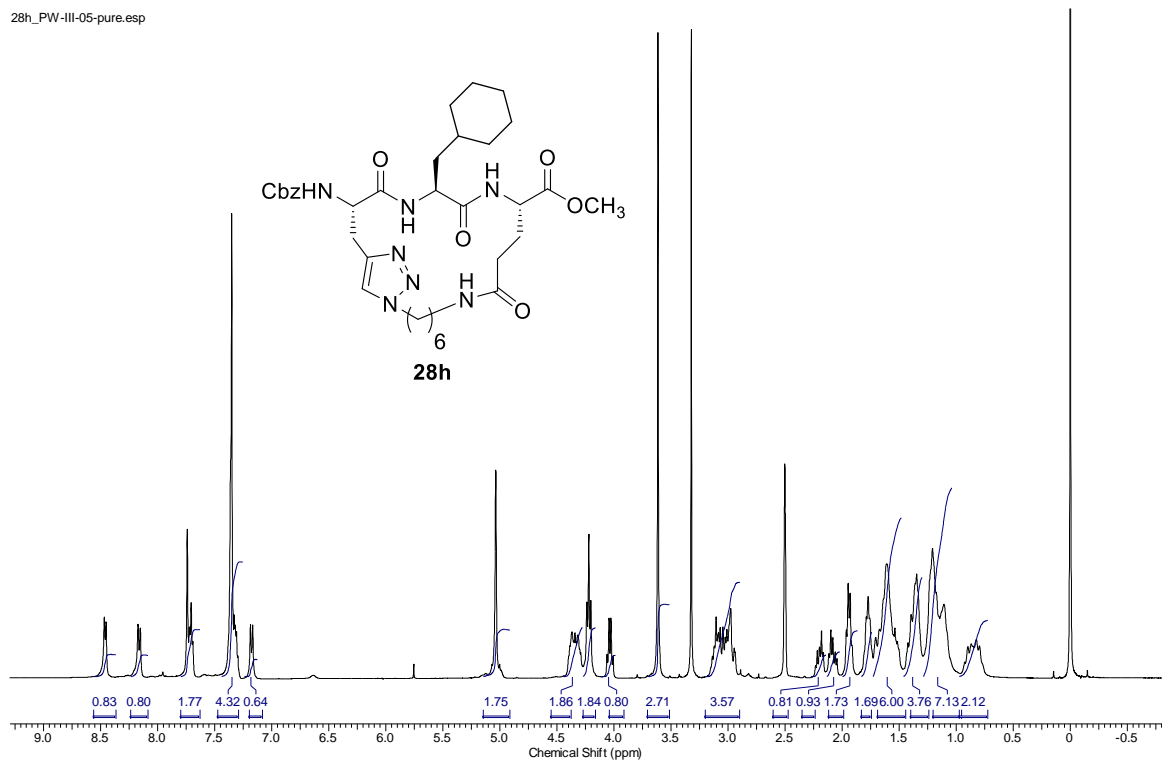

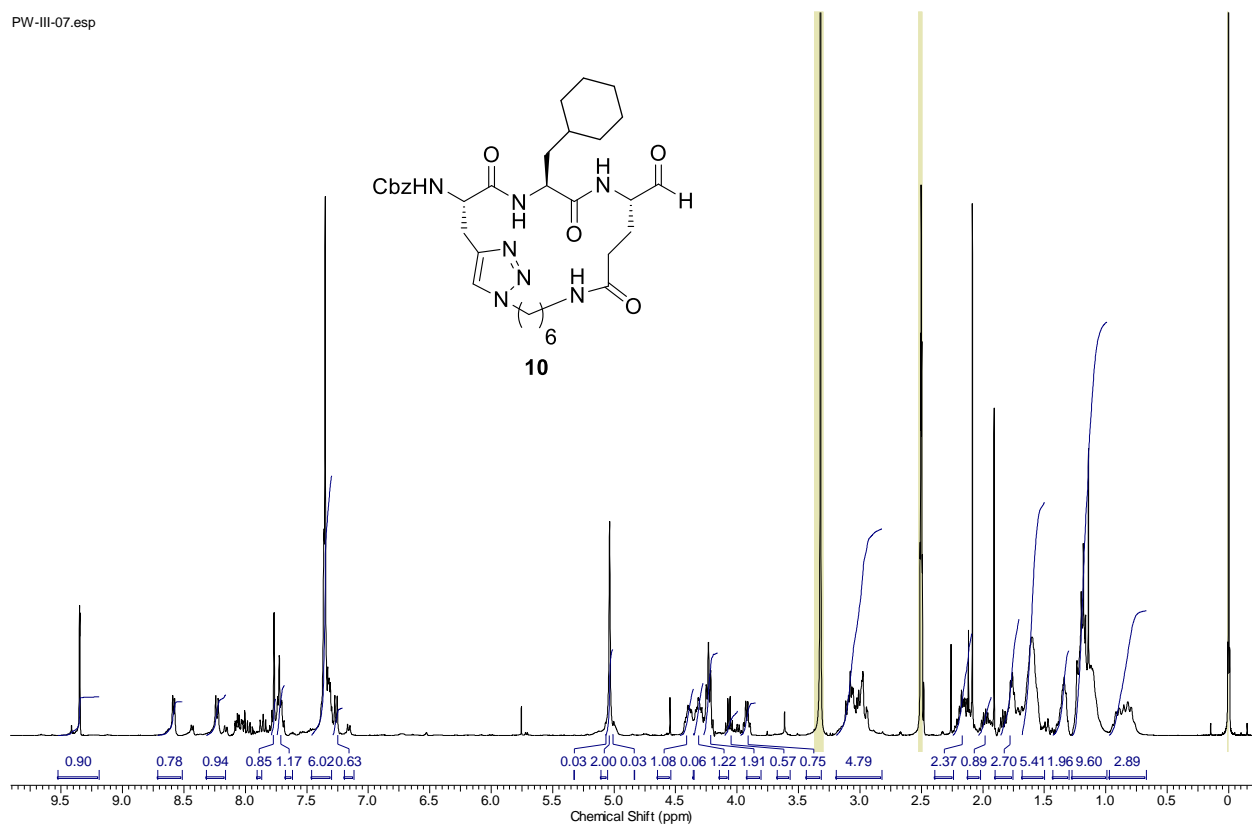

## 5. X-ray crystallography-derived information

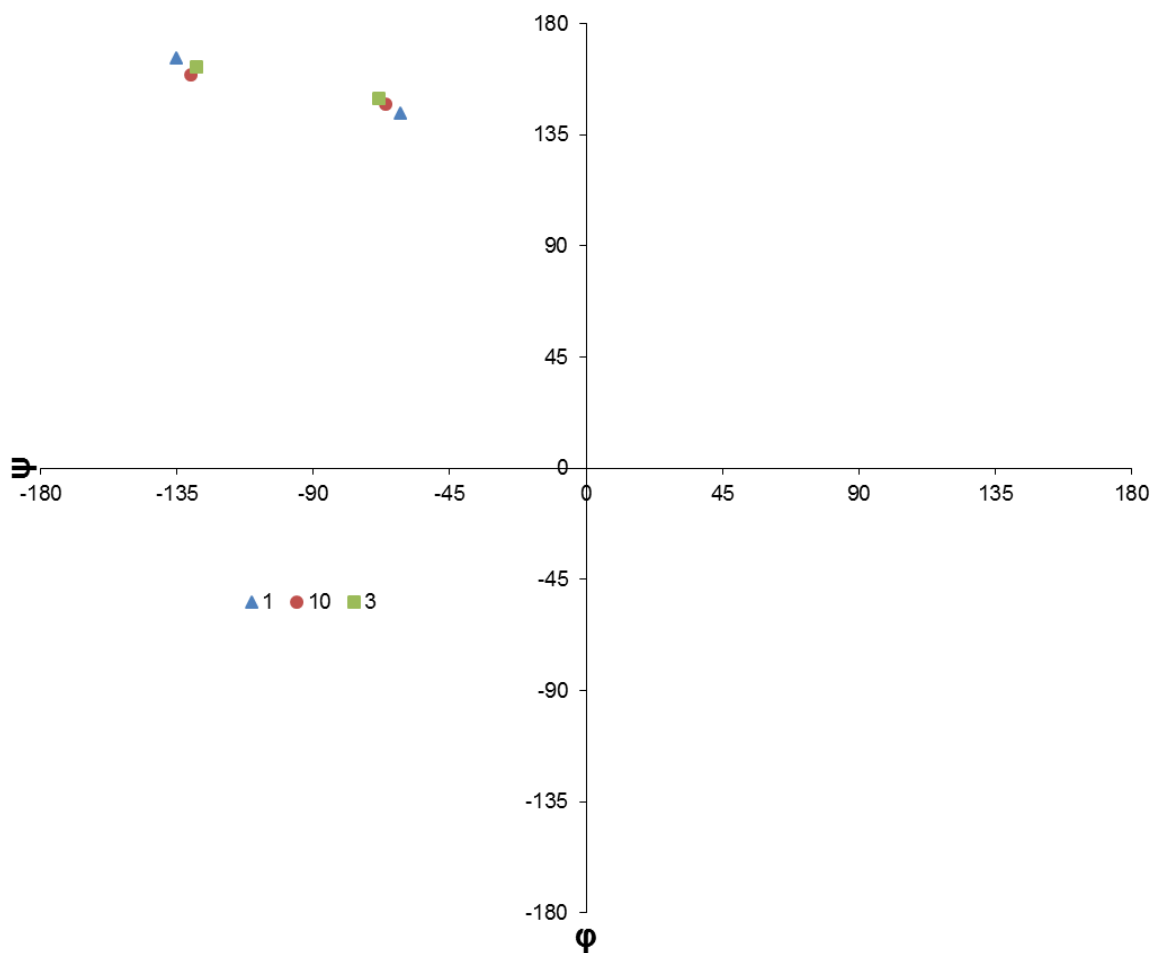

**FIGURE S8.** The coordinates of the Ramachandran plot of six  $\phi$  and  $\psi$  angle pairs of the corresponding  $P_2$  and  $P_3$  residues, extracted from the X-ray crystal structures.

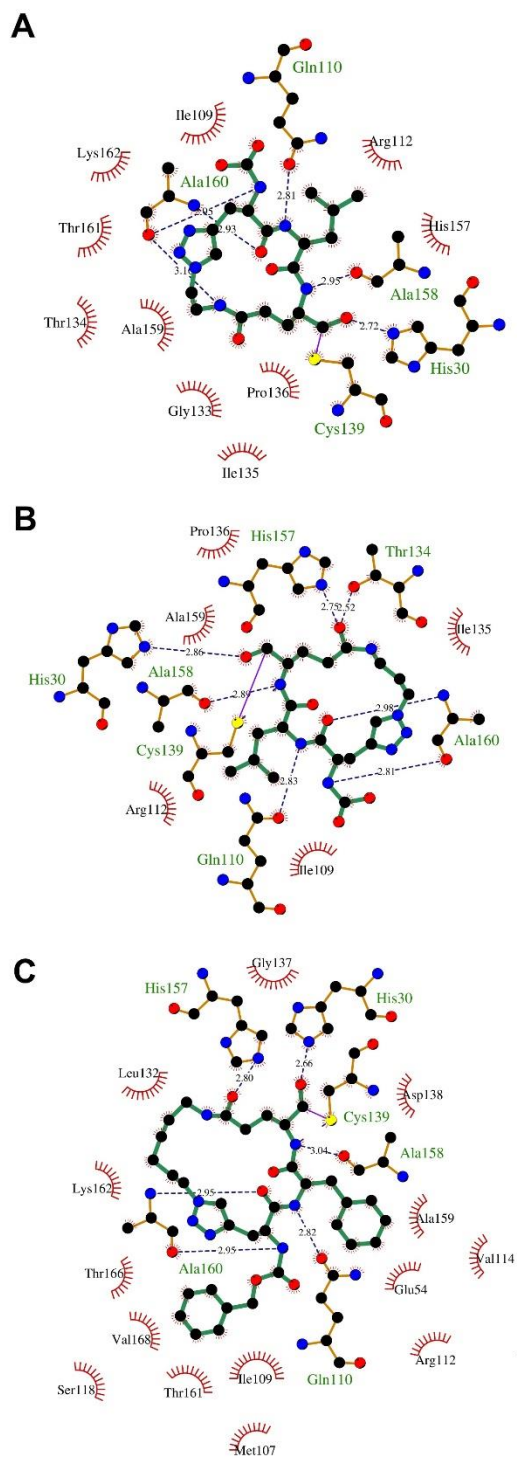

**FIGURE S9.** LigPlot diagrams of the X-ray crystal structures. A) NV 3CLPro:**1** complex. B) NV 3CLPro:**3** complex. C) NV 3CLPro:**10** complex

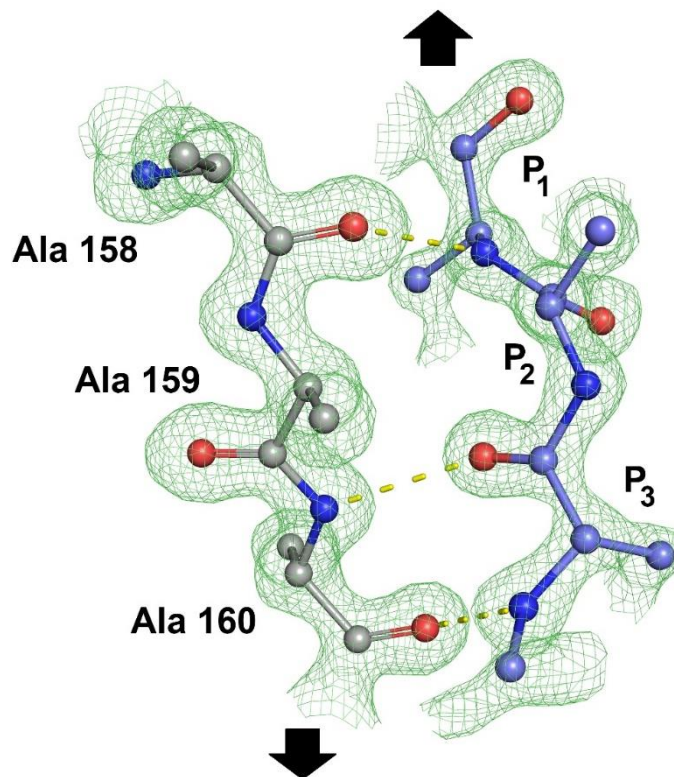

**FIGURE S10.** 2-Stranded antiparallel  $\beta$ -sheet arrangement between NV 3CLPro and backbone of inhibitor **11** from the X-ray crystal structure. Hydrogen bonds are shown in yellow color dashes and direction of the two strands are shown in black color arrows. Oxygen atoms are in red color, Nitrogen atoms are in blue color and hydrogen atoms are omitted for convenience. NV 3CLPro carbon atoms are in ash color and inhibitor carbon atoms are in light blue color. Sidechains are shown only up to the first sidechain carbon atom.  $2F_o-F_c$  electron density map is shown in green color at  $1.5\sigma$ .
